# Supplementary material for: Recurrence rates provide evidence for sex-differential, familial genetic liability for autism spectrum disorders in multiplex families and twins
Source: Mol Autism. 2015 May 13;6:27. doi: 10.1186/s13229-015-0004-5 (PMC4429923; doi:10.1186/s13229-015-0004-5)
Supplement: Additional file 2: Tables S1 to S6. — Table S1. Recurrence risk in multiplex AGRE families by sex and family type. Table S2. Logistic regression for affection status by sex and family type. Table S3. Logistic regression for affection status by interbirth interval. Table S4. Concordance rates in monozygotic and dizygotic twin pairs. Table S5. Adaptive behavior, intellectual ability, and ASD symptoms by sex and family type. Table S6. Adaptive behavior, intellectual ability, and ASD symptoms by family stoppage status. [file 13229_2015_4_MOESM2_ESM.pdf]

## SUPPLEMENTAL TABLES

**Table S1: Recurrence risk in multiplex AGRE families by sex and family type**

**A) All children born after 2nd affected. N=341 families, N=456 children, 36.0% affected**

|       |         | N   | Recur. rate | 95% CI         | Relative risk | P-value  | Adj. P   |
|-------|---------|-----|-------------|----------------|---------------|----------|----------|
| All   | Males   | 257 | 47.47%      | 41.45 – 53.57% | M/F           |          |          |
|       | Females | 199 | 21.11%      | 16.01 – 27.29% | 2.25          | 3.11e-09 | 6.22e-08 |
| All   | FC      | 183 | 44.26%      | 37.26 – 51.50% | FC/MO         |          |          |
|       | MO      | 273 | 30.40%      | 25.25 – 36.10% | 1.46          | 1.78e-03 | 0.036    |
| Males | FC      | 111 | 54.05%      | 44.80 – 63.03% | FC/MO         |          |          |
|       | MO      | 146 | 42.47%      | 34.74 – 50.58% | 1.27          | 0.043    | 0.86     |
| FC    | Males   | 111 | 54.05%      | 44.80 – 63.03% | M/F           |          |          |
|       | Females | 72  | 29.17%      | 19.94 – 40.51% | 1.85          | 7.18e-04 | 0.014    |

**B) First child born after 2nd affected. N=341 families, 38.4% affected**

|       |         | N   | Recur. rate | 95% CI         | Relative risk | P-value  | Adj. P   |
|-------|---------|-----|-------------|----------------|---------------|----------|----------|
| All   | Males   | 190 | 51.58%      | 44.51 – 58.58% | M/F           |          |          |
|       | Females | 151 | 21.85%      | 16.01 – 29.10% | 2.36          | 1.21e-08 | 2.42e-07 |
| All   | FC      | 131 | 44.28%      | 36.05 – 52.82% | FC/MO         |          |          |
|       | MO      | 210 | 34.76%      | 28.65 – 41.42% | 1.27          | 0.051    | 1        |
| Males | FC      | 76  | 56.58%      | 45.39 – 67.14% | FC/MO         |          |          |
|       | MO      | 114 | 48.25%      | 39.28 – 57.32% | 1.17          | 0.16     | 1        |
| FC    | Males   | 76  | 56.58%      | 45.39 – 67.14% | M/F           |          |          |
|       | Females | 55  | 27.27%      | 17.28 – 40.23% | 2.07          | 7.19e-04 | 0.014    |

**C) First child born after 2nd affected in families with exactly 3 children. N=198 families, 38.9% affected**

|       |         | N   | Recur. rate | 95% CI         | Relative risk | P-value  | Adj. P   |
|-------|---------|-----|-------------|----------------|---------------|----------|----------|
| All   | Males   | 111 | 52.25%      | 43.04 – 61.31% | M/F           |          |          |
|       | Females | 87  | 21.84%      | 14.45 – 31.61% | 2.39          | 9.57e-06 | 1.91e-04 |
| All   | FC      | 72  | 48.61%      | 37.43 – 59.93% | FC/MO         |          |          |
|       | MO      | 126 | 33.33%      | 25.70 – 41.95% | 1.46          | 0.025    | 0.49     |
| Males | FC      | 40  | 65.00%      | 49.51 – 77.87% | FC/MO         |          |          |
|       | MO      | 71  | 45.07%      | 34.05 – 56.60% | 1.44          | 0.034    | 0.68     |
| FC    | Males   | 40  | 65.00%      | 49.51 – 77.87% | M/F           |          |          |
|       | Females | 32  | 28.13%      | 15.56 – 45.37% | 2.31          | 1.86e-03 | 0.037    |

**D) First child born after 2nd affected is last child in family. N=258 families, 37.6% affected**

|       |         | N   | Recur. rate | 95% CI         | Relative risk | P-value  | Adj. P   |
|-------|---------|-----|-------------|----------------|---------------|----------|----------|
| All   | Males   | 144 | 50.69%      | 42.62 – 58.74% | M/F           |          |          |
|       | Females | 114 | 21.05%      | 14.58 – 29.42% | 2.41          | 6.87e-07 | 1.37e-05 |
| All   | FC      | 90  | 46.67%      | 36.71 – 56.90% | FC/MO         |          |          |
|       | MO      | 168 | 32.74%      | 26.10 – 40.15% | 1.43          | 0.020    | 0.39     |
| Males | FC      | 52  | 59.62%      | 46.07 – 71.84% | FC/MO         |          |          |
|       | MO      | 92  | 45.65%      | 35.85 – 55.80% | 1.31          | 0.075    | 1        |
| FC    | Males   | 52  | 59.62%      | 46.07 – 71.84% | M/F           |          |          |
|       | Females | 38  | 28.95%      | 17.00 – 44.76% | 2.06          | 3.59e-03 | 0.072    |

**E) Any 1 child selected after masking 2 affected children at random, 100 randomizations (Familial risk). N=556 families, 17.5% affected**

|       |         | N   | Recur. rate | 95% CI         | Relative risk | P-value  | Adj. P   |
|-------|---------|-----|-------------|----------------|---------------|----------|----------|
| All   | Males   | 270 | 25.56%      | 20.72 – 31.08% | M/F           |          |          |
|       | Females | 286 | 9.79%       | 6.86 – 13.79%  | 2.61          | 6.70e-07 | 1.34e-05 |
| All   | FC      | 208 | 22.60%      | 17.44 – 28.75% | FC/MO         |          |          |
|       | MO      | 348 | 14.37%      | 11.07 – 18.44% | 1.57          | 9.72e-03 | 0.19     |
| Males | FC      | 99  | 31.31%      | 23.02 – 41.00% | FC/MO         |          |          |
|       | MO      | 171 | 22.22%      | 16.64 – 29.03% | 1.41          | 0.067    | 1        |
| FC    | Males   | 99  | 31.31%      | 23.02 – 41.00% | M/F           |          |          |
|       | Females | 109 | 14.68%      | 9.24 – 22.52%  | 2.13          | 3.38e-03 | 0.068    |

FC = female-containing family; MO = male-only family. Unadjusted P-values are from one-sided Fisher's exact tests for affection status by sex or by family type. Adjusted P-values have been corrected for 20 tests.

**Table S2: Logistic regression for affection status by sex and family type**

**A) All children born after 2nd affected. N=341 families, N=456 children, 36.0% affected**

| Term                          | Estimate | Std Error | ChiSquare | Prob>ChiSq |
|-------------------------------|----------|-----------|-----------|------------|
| Intercept                     | -0.662   | 0.109     | 37.16     | 1.09e-09   |
| Sex [Male]                    | 0.591    | 0.109     | 29.66     | 5.15e-08   |
| Family type [FC]              | 0.299    | 0.109     | 7.61      | 5.80e-03   |
| Sex[Male] by Family type [FC] | -0.066   | 0.109     | 0.37      | 0.54       |

**B) First child born after 2nd affected. N=341 families, 38.4% affected**

| Term                          | Estimate | Std Error | ChiSquare | Prob>ChiSq |
|-------------------------------|----------|-----------|-----------|------------|
| Intercept                     | -0.563   | 0.125     | 20.4      | 6.28e-06   |
| Sex [Male]                    | 0.660    | 0.125     | 28.06     | 1.18e-07   |
| Family type [FC]              | 0.205    | 0.125     | 2.71      | 0.01       |
| Sex[Male] by Family type [FC] | -0.038   | 0.125     | 0.09      | 0.76       |

**C) First child born after 2nd affected in families with exactly 3 children. N=198 families, 38.9% affected**

| Term                          | Estimate | Std Error | ChiSquare | Prob>ChiSq |
|-------------------------------|----------|-----------|-----------|------------|
| Intercept                     | -0.531   | 0.143     | 13.85     | 1.98e-04   |
| Sex [Male]                    | 0.720    | 0.143     | 25.44     | 4.56e-07   |
| Family type [FC]              | 0.234    | 0.143     | 2.7       | 0.10       |
| Sex[Male] by Family type [FC] | 0.025    | 0.143     | 0.03      | 0.86       |

**D) First child born after 2nd affected is last child in family. N=258 families, 37.6% affected**

| Term                          | Estimate | Std Error | ChiSquare | Prob>ChiSq |
|-------------------------------|----------|-----------|-----------|------------|
| Intercept                     | -0.565   | 0.147     | 14.84     | 1.17e-04   |
| Sex [Male]                    | 0.673    | 0.147     | 21.03     | 4.52e-06   |
| Family type [FC]              | 0.311    | 0.147     | 4.49      | 0.034      |
| Sex[Male] by Family type [FC] | -0.029   | 0.147     | 0.04      | 0.84       |

**E) Any 1 child selected after masking 2 affecteds at random, 100 randomizations (Familial risk). N=554 families, 17.5% affected**

| Term                          | Estimate | Std Error | ChiSquare | Prob>ChiSq |
|-------------------------------|----------|-----------|-----------|------------|
| Intercept                     | -1.605   | 0.123     | 169.27    | 1.07e-38   |
| Sex [Male]                    | 0.586    | 0.123     | 22.55     | 2.05e-06   |
| Family type [FC]              | 0.332    | 0.123     | 7.25      | 7.09e-03   |
| Sex[Male] by Family type [FC] | -0.098   | 0.123     | 0.64      | 0.42       |

FC = female-containing family; MO = male-only family. Chi-squared statistics and unadjusted P-values are from the logistic regression for affection status by sex, family type, and the interaction between sex and family type.

**Table S3: Logistic regression for affection status by inter-birth interval**

| <b>Term</b>                  | <b>Estimate</b> | <b>Std Error</b> | <b>ChiSquare</b> | <b>Prob&gt;ChiSq</b> |
|------------------------------|-----------------|------------------|------------------|----------------------|
| <b>Intercept</b>             | 2.891           | 1.193            | 5.88             | 0.015                |
| <b>ln(IBI)</b>               | -0.657          | 0.278            | 5.6              | 0.018                |
| <b>Sex [Male]</b>            | 0.699           | 0.131            | 28.56            | 9.08e-08             |
| <b>ln(IBI) by sex [Male]</b> | -0.410          | 0.270            | 2.3              | 0.13                 |
| <b>Family type [FC]</b>      | 0.194           | 0.126            | 2.35             | 0.13                 |
| <b>Maternal age</b>          | -0.029          | 0.036            | 0.68             | 0.41                 |
| <b>Paternal age</b>          | -0.010          | 0.029            | 0.12             | 0.73                 |

IBI = interbirth interval (months). FC = female-containing family, which is contrasted with families classified as male-only (MO). Estimates, chi-squared statistics, and P-values (Prob>ChiSq) are from a logistic regression model of affection status in the child born after the second affected child from each family (N=341) by the natural log of IBI in months, sex of the child, family type (FC or MO), maternal age, and paternal age at the time of the child's birth.

**Table S4: Concordance rates in monozygotic and dizygotic twin pairs**

**A) Monozygotic twin pairs, N=112, 93.8% concordant**

|               | N  | Concordance | 95% CI         | Relative risk | P-value |
|---------------|----|-------------|----------------|---------------|---------|
| Female-Female | 20 | 85.00%      | 63.96 – 94.76% | F-F/M-M       |         |
| Male-Male     | 92 | 95.65%      | 89.35 – 98.30% | 0.89          | 0.11    |

**B) Dizygotic twin pairs, N=193 pairs, 43.0% concordant.**

|                |                           | N   | Recur.<br>rate | 95% CI         | Relative<br>risk | P-value  | Adj P    |
|----------------|---------------------------|-----|----------------|----------------|------------------|----------|----------|
| All            | Male co-twin              | 109 | 61.47%         | 52.09 – 70.07% | M/F co-twin      |          |          |
|                | Female co-twin            | 84  | 19.05%         | 12.08 – 28.72% | 3.23             | 1.92e-09 | 7.66e-09 |
| All            | Co-twin of female proband | 36  | 50.00%         | 34.47 – 65.53% | F/M proband      |          |          |
|                | Co-twin of male proband   | 157 | 41.40%         | 33.99 – 49.22% | 1.21             | 0.23     | 0.90     |
| Male co-twin   | Female proband            | 21  | 71.43%         | 50.04 – 86.19% | F/M proband      |          |          |
|                | Male proband              | 88  | 59.09%         | 48.65 – 68.77% | 1.21             | 0.22     | 0.86     |
| Female proband | Male co-twin              | 21  | 71.43%         | 50.04 – 86.19% | M/F co-twin      |          |          |
|                | Female co-twin            | 15  | 20.00%         | 7.05 – 45.19%  | 3.57             | 2.97e-03 | 0.012    |

**C) Logistic regression for co-twin affection status by co-twin sex and proband sex in dizygotic twin pairs.**

| Term                                       | Estimate | Std Error | ChiSquare | Prob>ChiSq |
|--------------------------------------------|----------|-----------|-----------|------------|
| Intercept                                  | -0.391   | 0.222     | 3.08      | 0.079      |
| Co-twin sex [Male]                         | 1.033    | 0.222     | 21.55     | 3.45e-06   |
| Proband sex [Female]                       | 0.156    | 0.222     | 0.49      | 0.48       |
| Proband sex [Female] by co-twin sex [Male] | 0.119    | 0.222     | 0.28      | 0.60       |

Unadjusted P-values in A) and B) are from one-sided Fisher's exact tests for co-twin affection status by co-twin sex or by proband twin sex. Adjusted P-values in B) have been corrected for 4 tests. In C), chi-squared statistics and P-values (Prob>ChiSq) are from logistic regression for co-twin affection status by co-twin sex, proband twin sex, and the interaction between co-twin and proband sex.

**Table S5: Adaptive behavior, intellectual ability, and ASD symptoms by sex and family type**

**A) Males vs. females, 1 randomly selected proband per family**

|              | Males |        |       | Females |        |       | Males vs. females |      |       |       |        |
|--------------|-------|--------|-------|---------|--------|-------|-------------------|------|-------|-------|--------|
|              | N     | Mean   | SD    | N       | Mean   | SD    | Diff.             | SE   | t     | P     | Adj. P |
| VABS         | 587   | 60.91  | 18.62 | 177     | 64.34  | 20.92 | -3.43             | 1.75 | -1.96 | 0.051 | 0.82   |
| PPVT         | 505   | 85.34  | 26.68 | 153     | 85.73  | 25.23 | -0.39             | 2.36 | -0.17 | 0.868 | 1      |
| Raven's NVIQ | 464   | 104.27 | 23.04 | 145     | 101.09 | 22.20 | 3.18              | 2.13 | 1.49  | 0.138 | 1      |
| SRS          | 373   | 103.85 | 33.34 | 120     | 101.53 | 37.33 | 2.32              | 3.82 | 0.61  | 0.544 | 1      |

**B) FC vs. MO, 1 randomly selected proband per family**

|              | FC  |        |       | MO  |        |       | FC vs. MO |      |       |          |        |
|--------------|-----|--------|-------|-----|--------|-------|-----------|------|-------|----------|--------|
|              | N   | Mean   | SD    | N   | Mean   | SD    | Diff      | SE   | t     | P        | Adj. P |
| VABS         | 293 | 64.47  | 20.40 | 471 | 59.99  | 18.25 | 4.42      | 1.46 | 3.02  | 2.60e-03 | 0.042  |
| PPVT         | 255 | 87.24  | 24.72 | 403 | 84.29  | 27.27 | 3.13      | 2.06 | 1.52  | 0.130    | 1      |
| Raven's NVIQ | 245 | 103.03 | 21.20 | 364 | 103.83 | 23.94 | -0.63     | 3.00 | -0.34 | 0.733    | 1      |
| SRS          | 193 | 99.53  | 36.13 | 300 | 105.70 | 32.95 | -6.16     | 3.22 | -1.91 | 0.057    | 0.91   |

**C) FC vs. MO, 1 randomly selected male proband per family**

|              | FC  |        |       | MO  |        |       | FC vs. MO |      |       |       |        |
|--------------|-----|--------|-------|-----|--------|-------|-----------|------|-------|-------|--------|
|              | N   | Mean   | SD    | N   | Mean   | SD    | Diff      | SE   | t     | P     | Adj. P |
| VABS         | 255 | 62.79  | 18.79 | 472 | 59.86  | 18.16 | 2.85      | 1.45 | 1.97  | 0.049 | 0.79   |
| PPVT         | 213 | 88.18  | 25.92 | 404 | 84.48  | 27.16 | 3.90      | 2.23 | 1.75  | 0.081 | 1      |
| Raven's NVIQ | 200 | 105.37 | 21.23 | 366 | 104.13 | 23.89 | 1.44      | 1.95 | 0.74  | 0.461 | 1      |
| SRS          | 158 | 105.66 | 32.85 | 301 | 106.19 | 32.99 | -0.53     | 3.23 | -0.16 | 0.870 | 1      |

**D) Males vs. females within FC families, 1 randomly selected affected brother & sister, paired test**

|              | Males |        |       | Females |        |       | Males vs. females |      |       |       |        |
|--------------|-------|--------|-------|---------|--------|-------|-------------------|------|-------|-------|--------|
|              | N     | Mean   | SD    | N       | Mean   | SD    | Diff              | SE   | t     | P     | Adj. P |
| VABS         | 251   | 62.77  | 18.86 | 251     | 65.62  | 20.27 | -2.85             | 1.34 | -2.12 | 0.035 | 0.56   |
| PPVT         | 171   | 89.91  | 25.04 | 171     | 89.89  | 24.49 | 0.02              | 2.28 | 0.01  | 0.992 | 1      |
| Raven's NVIQ | 163   | 107.20 | 20.99 | 163     | 103.53 | 23.39 | 3.67              | 2.22 | 1.65  | 0.100 | 1      |
| SRS          | 142   | 107.27 | 33.01 | 142     | 104.93 | 35.33 | 2.34              | 3.82 | 0.61  | 0.542 | 1      |

FC, female-containing family; MO, male-only family; VABS, Vineland Adaptive Behavior Scales composite standard score; PPVT, Peabody Picture Vocabulary Test standard score; Raven NVIQ, Raven's Progressive Matrices estimated non-verbal intelligence quotient; SRS, Social Responsiveness Scale raw total score. T statistics and unadjusted P-values are from two-sided t-tests allowing for unequal variances for affection status by sex or by family type. For D), a paired t-test was used to compare affected males and females from the same families. Adjusted P-values have been corrected for 16 tests.

**Table S6: Adaptive behavior, intellectual ability, and ASD symptoms by family stoppage status**

**A) Families who stopped vs. continued having children, 1 randomly selected proband per family**

|            | Stop |       |      | Continue |       |      | Stop vs. continue |      |       |       |        |
|------------|------|-------|------|----------|-------|------|-------------------|------|-------|-------|--------|
|            | N    | Mean  | SD   | N        | Mean  | SD   | Diff.             | SE   | t     | P     | Adj. P |
| VABS       | 533  | 60.9  | 19.0 | 231      | 63.6  | 19.6 | -2.71             | 1.53 | -1.77 | 0.077 | 0.82   |
| PPVT       | 461  | 84.4  | 26.9 | 197      | 87.9  | 24.9 | -3.56             | 2.17 | -1.64 | 0.102 | 1      |
| Raven NVIQ | 421  | 103.2 | 23.6 | 188      | 104.1 | 21.1 | -0.86             | 1.92 | -0.45 | 0.653 | 1      |
| SRS        | 353  | 101.5 | 33.6 | 140      | 107.9 | 35.8 | -6.45             | 3.51 | -1.83 | 0.068 | 1      |

**B) Families with  $\geq 3$  full sibling children who stopped vs. continued having children, 1 randomly selected proband per family**

|            | Stop |       |      | Continue |       |      | Stop vs. continue |      |       |          |        |
|------------|------|-------|------|----------|-------|------|-------------------|------|-------|----------|--------|
|            | N    | Mean  | SD   | N        | Mean  | SD   | Diff.             | SE   | t     | P-value  | Adj. P |
| VABS       | 138  | 57.8  | 20.2 | 231      | 63.6  | 19.6 | -5.75             | 2.15 | -2.68 | 7.90e-03 | 0.13   |
| PPVT       | 114  | 82.4  | 30.3 | 197      | 87.9  | 24.9 | -5.55             | 3.35 | -1.66 | 0.099    | 1      |
| Raven NVIQ | 112  | 101.5 | 27.2 | 188      | 104.1 | 21.1 | -2.63             | 2.99 | -0.88 | 0.380    | 1      |
| SRS        | 92   | 103.7 | 34.7 | 140      | 107.9 | 35.8 | -4.23             | 4.72 | -0.90 | 0.371    | 1      |

**C) FC Families with  $\geq 3$  full sibling children who stopped vs. continued having children, 1 randomly selected proband per family**

|            | Stop |       |      | Continue |       |      | Stop vs. continue |      |       |          |        |
|------------|------|-------|------|----------|-------|------|-------------------|------|-------|----------|--------|
|            | N    | Mean  | SD   | N        | Mean  | SD   | Diff.             | SE   | t     | P        | Adj. P |
| VABS       | 43   | 56.2  | 22.8 | 99       | 67.0  | 20.2 | -10.73            | 4.03 | -2.66 | 9.60e-03 | 0.15   |
| PPVT       | 35   | 86.1  | 28.1 | 87       | 89.8  | 23.8 | -4.03             | 5.40 | -0.75 | 0.459    | 1      |
| Raven NVIQ | 38   | 101.3 | 23.9 | 84       | 103.9 | 21.7 | -2.88             | 4.55 | -0.63 | 0.529    | 1      |
| SRS        | 32   | 109.2 | 29.7 | 51       | 101.3 | 38.3 | 7.85              | 7.51 | 1.05  | 0.299    | 1      |

**D) MO Families with  $\geq 3$  full sibling children who stopped vs. continued having children, 1 randomly selected proband per family**

|            | Stop |       |      | Continue |       |      | Stop vs. continue |      |       |       |        |
|------------|------|-------|------|----------|-------|------|-------------------|------|-------|-------|--------|
|            | N    | Mean  | SD   | N        | Mean  | SD   | Diff.             | SE   | t     | P     | Adj. P |
| VABS       | 95   | 58.6  | 19.0 | 132      | 61.0  | 18.7 | -2.54             | 2.54 | -1.00 | 0.318 | 1      |
| PPVT       | 79   | 80.7  | 31.2 | 110      | 86.5  | 25.8 | -5.50             | 4.28 | -1.28 | 0.201 | 1      |
| Raven NVIQ | 74   | 101.6 | 28.9 | 104      | 104.3 | 20.7 | -2.49             | 3.92 | -0.64 | 0.527 | 1      |
| SRS        | 60   | 100.7 | 37.0 | 89       | 111.7 | 33.9 | -10.93            | 5.98 | -1.83 | 0.070 | 1      |

VABS = Vineland Adaptive Behavior Scales composite standard score; PPVT = Peabody Picture Vocabulary Test standard score; Raven NVIQ = Raven's Progressive Matrices estimated non-verbal intelligence quotient; SRS = Social Responsiveness Scale raw total score. T statistics and unadjusted P-values are from two-sided t-tests allowing for unequal variances for family's stoppage status. Adjusted P-values are corrected for 16 tests.
